# Supplementary material for: Association of a Large Panel of Cytokine Gene Polymorphisms with Complications and Comorbidities in Type 2 Diabetes Patients
Source: PubMed Central journal article supplement (PMC4438177; doi:10.1155/2015/605965), 2015-05-06
Supplement: 605965.f1.pdf [file 605965.f1.pdf]

**SUPPLEMENTARY MATERIAL**

**Table SM1:** Distributions of genotypes and alleles frequencies in T2D patients considering complications.

| Polymorphisms                                                      |                  | Diabetic Retinopathy |               |       |       |               |
|--------------------------------------------------------------------|------------------|----------------------|---------------|-------|-------|---------------|
|                                                                    |                  | Yes (n=66) (%)       | No (n=36) (%) | p     | OR    | 95% CI        |
| <b>TNF-<math>\alpha</math> -308 A/G</b><br><b>(rs 1800629)</b>     | <b>Genotypes</b> |                      |               |       |       |               |
|                                                                    | GG               | 49 (74.24)           | 29 (80.56)    | 0.252 | Ref.  | 0.594 - 4.734 |
|                                                                    | GA               | 17 (25.76)           | 6 (16.67)     |       | 1.677 |               |
|                                                                    | AA               | 0                    | 1 (2.77)      |       | -     |               |
|                                                                    | <b>Alleles</b>   |                      |               | 0.713 | 0.846 | 0.314 - 2.224 |
| G                                                                  | 115 (87.12)      | 64 (88.89)           |               |       |       |               |
| A                                                                  | 17 (12.88)       | 8 (11.11)            |               |       |       |               |
| <b>TGF-<math>\beta</math>1 codon 10 T/C</b><br><b>(rs 1982073)</b> | <b>Genotypes</b> |                      |               |       |       |               |
|                                                                    | TT               | 25 (37.88)           | 10 (27.78)    | 0.246 | Ref.  | 0.746 - 4.610 |
|                                                                    | TC               | 31 (46.97)           | 23 (63.89)    |       | 1.855 |               |
|                                                                    | CC               | 10 (15.15)           | 3 (8.33)      |       | 0.750 |               |
|                                                                    | <b>Alleles</b>   |                      |               | 0.819 | 1.071 | 0.571 - 2.008 |
| T                                                                  | 81 (61.36)       | 43 (59.72)           |               |       |       |               |
| C                                                                  | 51 (38.64)       | 29 (40.28)           |               |       |       |               |

|                                                   |                  |            |            |        |                |                |
|---------------------------------------------------|------------------|------------|------------|--------|----------------|----------------|
| <b>TGF-β1 codon 25 C/G</b><br><b>(rs 1800471)</b> | <b>Genotypes</b> |            |            |        |                |                |
|                                                   | GG               | 61 (92.42) | 26 (72.22) | 0.004* | Ref.           | 1.685 - 20.413 |
|                                                   | GC               | 4 (6.06)   | 10 (27.78) |        | 5.865          |                |
|                                                   | CC               | 1 (1.52)   | 0,0        |        | -              |                |
|                                                   | <b>Alleles</b>   |            |            |        |                |                |
| G                                                 | 126 (95.45)      | 62 (86.11) | 0.018*     | 3.387  | 1.069 - 11.064 |                |
| C                                                 | 6 (4.55)         | 10 (13.89) |            |        |                |                |
| <b>IL-10 -1082 G/A</b><br><b>(rs 1800896)</b>     | <b>Genotypes</b> |            |            |        |                |                |
|                                                   | GG               | 8 (12.12)  | 4 (11.11)  | 0.841  | Ref.           | 0.266 - 4.032  |
|                                                   | GA               | 29 (43.94) | 18 (50.00) |        | 1.036          |                |
|                                                   | AA               | 29 (43.94) | 14 (38.89) |        | 1.286          |                |
|                                                   | <b>Alleles</b>   |            |            |        |                |                |
| G                                                 | 45 (34.09)       | 26 (36.11) | 0.772      | 0.915  | 0.418 - 1.744  |                |
| A                                                 | 87 (65.91)       | 46 (63.89) |            |        |                |                |
| <b>IL-10 -819 C/T</b><br><b>(rs 1800871)</b>      | <b>Genotypes</b> |            |            |        |                |                |
|                                                   | TT               | 10 (15.15) | 3 (8.33)   | 0.613  | Ref.           | 0.474 - 8.444  |
|                                                   | TC               | 25 (37.88) | 15 (41.67) |        | 2.000          |                |
|                                                   | CC               | 31 (46.97) | 18 (50.00) |        | 1.935          |                |
|                                                   | <b>Alleles</b>   |            |            |        |                |                |
| T                                                 | 45 (34.09)       | 21 (29.17) | 0.472      | 1.256  | 0.645 - 2.457  |                |

|                                              |                  |             |            |       |       |               |
|----------------------------------------------|------------------|-------------|------------|-------|-------|---------------|
|                                              | C                | 87 (65.91)  | 51 (70.83) |       |       |               |
| <b>IL-10 -592 C/A</b><br><b>(rs 1800872)</b> | <b>Genotypes</b> |             |            |       |       |               |
|                                              | CC               | 31 (46.97)  | 18 (50.00) |       | Ref.  |               |
|                                              | CA               | 24 (36.36)  | 15 (41.67) | 0.498 | 2.129 | 0.524 - 8.655 |
|                                              | AA               | 11 (16.67)  | 3 (8.33)   |       | 2.292 | 0.548 - 9.579 |
|                                              | <b>Alleles</b>   |             |            |       |       |               |
|                                              | C                | 86 (65.15)  | 51 (70.83) |       |       |               |
|                                              | A                | 46 (34.85)  | 21 (29.17) | 0.409 | 0.770 | 0.394 - 1.498 |
| <b>IL-6 -174 C/G</b><br><b>(rs 1800795)</b>  | <b>Genotypes</b> |             |            |       |       |               |
|                                              | GG               | 46 (69.69)  | 23 (63.89) |       | Ref.  |               |
|                                              | GC               | 15 (22.73)  | 11 (30.56) | 0.692 | 1.467 | 0.582 - 3.699 |
|                                              | CC               | 5 (7.58)    | 2 (5.55)   |       | 0.800 | 0.144 - 4.443 |
|                                              | <b>Alleles</b>   |             |            |       |       |               |
|                                              | G                | 107 (81.06) | 57 (79.17) |       |       |               |
|                                              | C                | 25 (18.94)  | 15 (20.83) | 0.745 | 1.126 | 0.517 - 2.438 |
| <b>INF-γ +874 T/A</b><br><b>(rs 2430561)</b> | <b>Genotypes</b> |             |            |       |       |               |
|                                              | TT               | 10 (15.15)  | 3 (8.33)   |       | Ref.  |               |
|                                              | TA               | 30 (45.45)  | 15 (41.67) | 0.465 | 0.433 | 0.104 - 1.799 |
|                                              | AA               | 26 (39.39)  | 18 (50.00) |       | 0.722 | 0.305 - 1.712 |
|                                              | <b>Alleles</b>   |             |            |       |       |               |

|  |   |            |            |       |       |               |
|--|---|------------|------------|-------|-------|---------------|
|  | T | 50 (37.88) | 21 (29.17) | 0.212 | 1.481 | 0.764 - 2.882 |
|  | A | 82 (62.12) | 51 (70.83) |       |       |               |

| Polymorphisms                                                      |                  | Diabetic Nephropathy |               |       |       |               |
|--------------------------------------------------------------------|------------------|----------------------|---------------|-------|-------|---------------|
|                                                                    |                  | Yes (n=80) (%)       | No (n=20) (%) | p     | OR    | CI (95%)      |
| <b>TNF-<math>\alpha</math> -308 A/G</b><br><b>(rs 1800629)</b>     | <b>Genotypes</b> |                      |               |       |       |               |
|                                                                    | GG               | 61 (76.25)           | 16 (80.00)    | 0.164 | Ref.  | 0.437 - 6.321 |
|                                                                    | GA               | 19 (23.75)           | 3 (15.00)     |       | 1.661 |               |
|                                                                    | AA               | 0                    | 1 (5.00)      |       | -     |               |
|                                                                    | <b>Alleles</b>   |                      |               | 1.000 | 1.060 | 0.321 - 3.297 |
| G                                                                  | 141 (88.13)      | 35 (87.50)           |               |       |       |               |
| A                                                                  | 19 (11.87)       | 5 (12.50)            |               |       |       |               |
| <b>TGF-<math>\beta</math>1 codon 10 T/C</b><br><b>(rs 1982073)</b> | <b>Genotypes</b> |                      |               |       |       |               |
|                                                                    | TT               | 28 (35.00)           | 6 (30.00)     | 0.363 | Ref.  | 0.514 - 4.471 |
|                                                                    | TC               | 40 (50.00)           | 13 (65.00)    |       | 1.517 |               |
|                                                                    | CC               | 12 (15.00)           | 1 (5.00)      |       | 0.389 |               |
|                                                                    | <b>Alleles</b>   |                      |               | 0.772 | 0.900 | 0.414 - 1.942 |
| T                                                                  | 96 (60.00)       | 25 (62.50)           |               |       |       |               |
| C                                                                  | 64 (40.00)       | 15 (37.50)           |               |       |       |               |
| <b>TGF-<math>\beta</math>1 codon 25 C/G</b>                        | <b>Genotypes</b> |                      |               |       |       |               |

|                                               |                  |             |            |        |       |               |
|-----------------------------------------------|------------------|-------------|------------|--------|-------|---------------|
| <b>(rs 1800471)</b>                           | GG               | 69 (86.25)  | 16 (80.00) | 0.578  | Ref.  | 0.479 - 6.209 |
|                                               | GC               | 10 (12.50)  | 4 (20.00)  |        | 1.725 |               |
|                                               | CC               | 1 (1.25)    | 0          |        | -     |               |
|                                               | <b>Alleles</b>   |             |            |        |       |               |
|                                               | G                | 148 (92.50) | 36 (90.00) | 0.532  | 1.370 | 0.349 - 4.962 |
|                                               | C                | 12 (7.50)   | 4 (10.00)  |        |       |               |
| <b>IL-10 -1082 G/A</b><br><b>(rs 1800896)</b> | <b>Genotypes</b> |             |            |        |       |               |
|                                               | GG               | 7 (8.75)    | 5 (25.00)  | 0.049* | Ref.  | 1.612 - 9.076 |
|                                               | GA               | 40 (50.00)  | 5 (25.00)  |        | 2.357 |               |
|                                               | AA               | 33 (41.25)  | 10 (50.00) |        | 0.413 |               |
|                                               | <b>Alleles</b>   |             |            |        |       |               |
|                                               | G                | 54 (33.75)  | 15 (37.50) | 0.655  | 0.849 | 0.391 - 1.854 |
|                                               | A                | 106 (66.25) | 25 (62.50) |        |       |               |
| <b>IL-10 -819 C/T</b><br><b>(rs 1800871)</b>  | <b>Genotypes</b> |             |            |        |       |               |
|                                               | TT               | 11 (13.75)  | 2 (10.00)  | 0.905  | Ref.  | 0.261 - 7.733 |
|                                               | TC               | 31 (38.75)  | 8 (40.00)  |        | 1.419 |               |
|                                               | CC               | 38 (47.50)  | 10 (50.00) |        | 1.447 |               |
|                                               | <b>Alleles</b>   |             |            |        |       |               |
|                                               | T                | 53 (33.13)  | 12 (30.00) | 0.706  | 1.156 | 0.514 - 2.628 |
|                                               | C                | 107 (66.87) | 28 (70.00) |        |       |               |
| <b>IL-10 -592 C/A</b>                         | <b>Genotypes</b> |             |            |        |       |               |

|                                                                |                  |             |            |       |       |               |
|----------------------------------------------------------------|------------------|-------------|------------|-------|-------|---------------|
| <b>(rs 1800872)</b>                                            | CC               | 38 (47.50)  | 10 (50.00) | 0.847 | Ref.  | 0.303 - 8.230 |
|                                                                | CA               | 30 (37.50)  | 8 (40.00)  |       | 1.579 |               |
|                                                                | AA               | 12 (15.00)  | 2 (10.00)  |       | 1.600 |               |
|                                                                | <b>Alleles</b>   |             |            |       |       |               |
|                                                                | C                | 106 (66.25) | 28 (70.00) | 0.652 | 0.841 | 0.370 - 1.889 |
|                                                                | A                | 54 (33.75)  | 12 (30.00) |       |       |               |
| <b>IL-6 -174 C/G</b><br><b>(rs 1800795)</b>                    | <b>Genotypes</b> |             |            |       |       |               |
|                                                                | GG               | 55 (68.75)  | 13 (65.00) | 0.808 | Ref.  | 0.445 - 4.010 |
|                                                                | GC               | 19 (23.75)  | 6 (30.00)  |       | 1.336 |               |
|                                                                | CC               | 6 (7.50)    | 1 (5.00)   |       | 0.705 |               |
|                                                                | <b>Alleles</b>   |             |            |       |       |               |
|                                                                | G                | 129 (80.63) | 32 (80.00) | 0.929 | 1.040 | 0.397 - 2.653 |
|                                                                | C                | 31 (19.37)  | 8 (20.00)  |       |       |               |
| <b>INF-<math>\gamma</math> +874 T/A</b><br><b>(rs 2430561)</b> | <b>Genotypes</b> |             |            |       |       |               |
|                                                                | TT               | 10 (12.50)  | 3 (15.00)  | 0.363 | Ref.  | 0.203 - 3.761 |
|                                                                | TA               | 38 (47.50)  | 6 (30.00)  |       | 0.873 |               |
|                                                                | AA               | 32 (40.00)  | 11 (55.00) |       | 0.459 |               |
|                                                                | <b>Alleles</b>   |             |            |       |       |               |
|                                                                | T                | 58 (36.25)  | 12 (30.00) | 0.459 | 1.327 | 0.593 - 3.007 |
|                                                                | A                | 102 (63.75) | 28 (70.00) |       |       |               |

| Polymorphisms                                                      |                  | Diabetic Neuropathy |               |       |               |               |
|--------------------------------------------------------------------|------------------|---------------------|---------------|-------|---------------|---------------|
|                                                                    |                  | Yes (n=42) (%)      | No (n=60) (%) | p     | OR            | CI (95%)      |
| <b>TNF-<math>\alpha</math> -308 A/G</b><br><b>(rs 1800629)</b>     | <b>Genotypes</b> |                     |               |       |               |               |
|                                                                    | GG               | 36 (85.71)          | 42 (70.00)    | 0.118 | Ref.<br>0.412 | 0.147 - 1.155 |
|                                                                    | GA               | 6 (14.29)           | 17 (28.33)    |       |               |               |
|                                                                    | AA               | 0                   | 1 (1.67)      |       |               |               |
|                                                                    | <b>Alleles</b>   |                     |               | 0.062 | 2.446         | 0.868 - 7.221 |
| G                                                                  | 78 (92.86)       | 101 (84.17)         |               |       |               |               |
| A                                                                  | 6 (7.14)         | 19 (15.83)          |               |       |               |               |
| <b>TGF-<math>\beta</math>1 codon 10 T/C</b><br><b>(rs 1982073)</b> | <b>Genotypes</b> |                     |               |       |               |               |
|                                                                    | TT               | 13 (30.95)          | 22 (36.67)    | 0.814 | Ref.<br>0.796 | 0.333 - 1.906 |
|                                                                    | TC               | 23 (54.76)          | 31 (51.67)    |       |               |               |
|                                                                    | CC               | 6 (14.29)           | 7 (11.66)     |       |               |               |
|                                                                    | <b>Alleles</b>   |                     |               | 0.549 | 0.840         | 0.456 - 1.546 |
| T                                                                  | 49 (58.33)       | 75 (62.50)          |               |       |               |               |
| C                                                                  | 35 (41.67)       | 45 (37.50)          |               |       |               |               |
| <b>TGF-<math>\beta</math>1 codon 25 C/G</b><br><b>(rs 1800471)</b> | <b>Genotypes</b> |                     |               |       |               |               |
|                                                                    | GG               | 34 (81.00)          | 53 (88.33)    | 0.307 | Ref.<br>0.481 | 0.153 - 1.509 |
|                                                                    | GC               | 8 (19.00)           | 6 (10.00)     |       |               |               |
|                                                                    | CC               | 0                   | 1 (1.67)      |       |               |               |
|                                                                    |                  |                     |               |       |               |               |

|                                               |                  |            |             |       |       |                |
|-----------------------------------------------|------------------|------------|-------------|-------|-------|----------------|
|                                               | <b>Alleles</b>   |            |             |       |       |                |
|                                               | G                | 76 (90.48) | 112 (93.33) | 0.455 | 0.679 | 0.220 - 2.095  |
|                                               | C                | 8 (9.52)   | 8 (6.67)    |       |       |                |
| <b>IL-10 -1082 G/A</b><br><b>(rs 1800896)</b> | <b>Genotypes</b> |            |             |       |       |                |
|                                               | GG               | 3 (7.14)   | 9 (15.00)   |       | Ref.  |                |
|                                               | GA               | 20 (47.62) | 27 (45.00)  | 0.474 | 2.375 | 0.563 - 10.010 |
|                                               | AA               | 19 (45.24) | 24 (40.00)  |       | 1.069 | 0.464 - 2.462  |
|                                               | <b>Alleles</b>   |            |             |       |       |                |
|                                               | G                | 26 (30.95) | 45 (37.50)  |       |       |                |
|                                               | A                | 58 (69.05) | 75 (62.50)  | 0.334 | 0.747 | 0.396 - 1.408  |
| <b>IL-10 -819 C/T</b><br><b>(rs 1800871)</b>  | <b>Genotypes</b> |            |             |       |       |                |
|                                               | TT               | 8 (19.05)  | 5 (8.33)    |       | Ref.  |                |
|                                               | TC               | 16 (38.10) | 24 (40.00)  | 0.266 | 2.400 | 0.665 - 8.666  |
|                                               | CC               | 18 (42.85) | 31 (51.67)  |       | 2.756 | 0.782 - 9.708  |
|                                               | <b>Alleles</b>   |            |             |       |       |                |
|                                               | T                | 32 (38.10) | 34 (28.33)  |       |       |                |
|                                               | C                | 52 (61.90) | 86 (71.67)  | 0.142 | 1.557 | 0.824 - 2.941  |
| <b>IL-10 -592 C/A</b><br><b>(rs 1800872)</b>  | <b>Genotypes</b> |            |             |       |       |                |
|                                               | CC               | 18 (42.86) | 31 (51.67)  |       | Ref.  |                |
|                                               | CA               | 15 (35.71) | 24 (40.00)  | 0.165 | 3.100 | 0.899 - 10.690 |
|                                               | AA               | 9 (21.43)  | 5 (8.33)    |       | 2.880 | 0.809 - 10.249 |



|                                                                |                  |            |            |       |               |               |
|----------------------------------------------------------------|------------------|------------|------------|-------|---------------|---------------|
|                                                                | <b>Alleles</b>   |            |            |       |               |               |
|                                                                | C                | 51 (60.71) | 86 (71.67) | 0.101 | 0.611         | 0.324 - 1.151 |
|                                                                | A                | 33 (39.29) | 34 (28.33) |       |               |               |
| <b>IL-6 -174 C/G</b><br><b>(rs 1800795)</b>                    | <b>Genotypes</b> |            |            |       |               |               |
|                                                                | GG               | 27 (64.29) | 42 (70.00) | 0.891 | Ref.          | 0.178 - 4.133 |
|                                                                | GC               | 12 (28.57) | 14 (23.33) |       |               |               |
|                                                                | CC               | 3 (7.14)   | 4 (6.67)   |       |               |               |
|                                                                | <b>Alleles</b>   |            |            |       |               |               |
| G                                                              | 66 (78.57)       | 98 (81.67) | 0.584      | 0.823 | 0.388 - 1.749 |               |
| C                                                              | 18 (21.43)       | 22 (18.33) |            |       |               |               |
| <b>INF-<math>\gamma</math> +874 T/A</b><br><b>(rs 2430561)</b> | <b>Genotypes</b> |            |            |       |               |               |
|                                                                | TT               | 4 (9.52)   | 9 (15.00)  | 0.455 | Ref.          | 0.550 - 7.675 |
|                                                                | TA               | 17 (40.48) | 28 (46.67) |       |               |               |
|                                                                | AA               | 21 (50.00) | 23 (38.33) |       |               |               |
|                                                                | <b>Alleles</b>   |            |            |       |               |               |
| T                                                              | 25 (29.76)       | 46 (38.33) | 0.206      | 0.682 | 0.360 - 1.288 |               |
| A                                                              | 59 (70.24)       | 74 (61.67) |            |       |               |               |

\*p<0.05 was considered statistically significant.

Ref. = reference

**Table SM2:** Distributions of genotypes and alleles frequencies in T2D patients considering comorbidities.

| Polymorphisms                                               |                  | Hypertension   |              |       |               |                |
|-------------------------------------------------------------|------------------|----------------|--------------|-------|---------------|----------------|
|                                                             |                  | Yes (n=94) (%) | No (n=8) (%) | p     | OR            | CI (95%)       |
| <b>TNF-<math>\alpha</math> -308 A/G</b><br>(rs 1800629)     | <b>Genotypes</b> |                |              |       |               |                |
|                                                             | GG               | 71 (75.53)     | 7 (87.50)    | 0.704 | Ref.          | 0.054 - 3.955  |
|                                                             | GA               | 22 (23.40)     | 1 (12.50)    |       | 0.461         |                |
|                                                             | AA               | 1 (1.07)       | 0            |       | -             |                |
|                                                             | <b>Alleles</b>   |                |              |       |               |                |
| G                                                           | 164 (87.23)      | 15 (93.75)     | 0.699        | 0.456 | 0.021 - 3.558 |                |
| A                                                           | 24 (12.77)       | 1 (6.25)       |              |       |               |                |
| <b>TGF-<math>\beta</math>1 codon 10 T/C</b><br>(rs 1982073) | <b>Genotypes</b> |                |              |       |               |                |
|                                                             | TT               | 34 (36.17)     | 1 (12.50)    | 0.073 | Ref.          | 0.039 - 3.433  |
|                                                             | TC               | 50 (53.19)     | 4 (50.00)    |       | 0.368         |                |
|                                                             | CC               | 10 (10.64)     | 3 (37.50)    |       | 0.098         |                |
|                                                             | <b>Alleles</b>   |                |              |       |               |                |
| T                                                           | 118 (62.77)      | 6 (37.50)      | 0.047*       | 2.810 | 1.890 - 9.148 |                |
| C                                                           | 70 (37.23)       | 10 (62.50)     |              |       |               |                |
| <b>TGF-<math>\beta</math>1 codon 25 C/G</b><br>(rs 1800471) | <b>Genotypes</b> |                |              |       |               |                |
|                                                             | GG               | 80 (85.11)     | 7 (87.50)    | 1.000 | Ref.          | 0.129 - 10.020 |
|                                                             | GC               | 13 (13.83)     | 1 (12.50)    |       | 1.137         |                |

|                                               |                  |             |            |        |               |                |
|-----------------------------------------------|------------------|-------------|------------|--------|---------------|----------------|
|                                               | CC               | 1 (1.06)    | 0          |        | -             | -              |
|                                               | <b>Alleles</b>   |             |            |        |               |                |
|                                               | G                | 173 (92.02) | 15 (93.75) | 1.000  | 0.769         | 0.036 - 6.265  |
|                                               | C                | 15 (7.98)   | 1 (6.25)   |        |               |                |
| <b>IL-10 -1082 G/A</b><br><b>(rs 1800896)</b> | <b>Genotypes</b> |             |            |        |               |                |
|                                               | GG               | 12 (12.77)  | 0          |        | -             | -              |
|                                               | GA               | 43 (45.74)  | 4 (50.00)  | 0.694  | 1.103         | 0.258 - 4.710  |
|                                               | AA               | 39 (41.49)  | 4 (50.00)  |        | Ref.          |                |
|                                               | <b>Alleles</b>   |             |            |        |               |                |
| G                                             | 67 (35.64)       | 4 (25.00)   | 0.586      | 1.661  | 0.472 - 6.383 |                |
| A                                             | 121 (64.36)      | 12 (75.00)  |            |        |               |                |
| <b>IL-10 -819 C/T</b><br><b>(rs 1800871)</b>  | <b>Genotypes</b> |             |            |        |               |                |
|                                               | TT               | 10 (10.64)  | 3 (37.50)  |        | Ref.          |                |
|                                               | TC               | 37 (39.36)  | 3 (37.50)  | 0.079  | 3.700         | 0.645 - 21.210 |
|                                               | CC               | 47 (50.00)  | 2 (25.00)  |        | 7.050         | 1.039 - 47.846 |
|                                               | <b>Alleles</b>   |             |            |        |               |                |
| T                                             | 57 (30.32)       | 9 (56.25)   | 0.033*     | 0.338  | 1.107 - 1.154 |                |
| C                                             | 131 (69.68)      | 7 (43.75)   |            |        |               |                |
| <b>IL-10 -592 C/A</b><br><b>(rs 1800872)</b>  | <b>Genotypes</b> |             |            |        |               |                |
|                                               | CC               | 47 (50.00)  | 2 (25.00)  | 0.013* | Ref.          |                |
|                                               | CA               | 37 (39.36)  | 2 (25.00)  |        | 9.400         | 1.509 - 58.568 |

|                                                                |                  |             |            |        |               |                |
|----------------------------------------------------------------|------------------|-------------|------------|--------|---------------|----------------|
|                                                                | AA               | 10 (10.64)  | 4 (50.00)  |        | 7.400         | 1.181 - 46.385 |
|                                                                | <b>Alleles</b>   |             |            |        |               |                |
|                                                                | C                | 131 (69.68) | 6 (37.50)  | 0.009* | 3.830         | 1.206 - 12.546 |
|                                                                | A                | 57 (30.32)  | 10 (62.50) |        |               |                |
| <b>IL-6 -174 C/G</b><br><b>(rs 1800795)</b>                    | <b>Genotypes</b> |             |            |        |               |                |
|                                                                | GG               | 65 (69.15)  | 4 (50.00)  | 0.117  | Ref.          | 0.127 - 4.295  |
|                                                                | GC               | 24 (25.53)  | 2 (25.00)  |        |               |                |
|                                                                | CC               | 5 (5.32)    | 2 (25.00)  |        |               |                |
|                                                                | <b>Alleles</b>   |             |            |        |               |                |
| G                                                              | 154 (81.91)      | 10 (62.50)  | 0.06       | 2.718  | 0.811 - 8.878 |                |
| C                                                              | 34 (18.09)       | 6 (37.50)   |            |        |               |                |
| <b>INF-<math>\gamma</math> +874 T/A</b><br><b>(rs 2430561)</b> | <b>Genotypes</b> |             |            |        |               |                |
|                                                                | TT               | 11 (11.70)  | 2 (25.00)  | 0.236  | Ref.          | 0.011 - 1.543  |
|                                                                | TA               | 40 (42.55)  | 5 (62.50)  |        |               |                |
|                                                                | AA               | 43 (45.74)  | 1 (12.50)  |        |               |                |
|                                                                | <b>Alleles</b>   |             |            |        |               |                |
| T                                                              | 62 (32.98)       | 9 (56.25)   | 0.061      | 0.383  | 0.121 - 1.189 |                |
| A                                                              | 126 (67.02)      | 7 (43.75)   |            |        |               |                |

| Polymorphisms                                                      |                  | Dyslipidemia   |              |       |               |                |
|--------------------------------------------------------------------|------------------|----------------|--------------|-------|---------------|----------------|
|                                                                    |                  | Yes (n=96) (%) | No (n=6) (%) | p     | OR            | CI (95%)       |
| <b>TNF-<math>\alpha</math> -308 A/G</b><br><b>(rs 1800629)</b>     | <b>Genotypes</b> |                |              |       |               |                |
|                                                                    | GG               | 73 (76.04)     | 5 (83.33)    | 1.000 | Ref.          | 0.167 - 13.590 |
|                                                                    | GA               | 22 (22.92)     | 1 (16.67)    |       | 1.507         |                |
|                                                                    | AA               | 1 (1.04)       | 0            |       | -             |                |
|                                                                    | <b>Alleles</b>   |                |              |       |               |                |
| G                                                                  | 168 (87.50)      | 11 (91.67)     | 1.000        | 0.636 | 0.029 - 5.160 |                |
| A                                                                  | 24 (12.50)       | 1 (8.33)       |              |       |               |                |
| <b>TGF-<math>\beta</math>1 codon 10 T/C</b><br><b>(rs 1982073)</b> | <b>Genotypes</b> |                |              |       |               |                |
|                                                                    | TT               | 34 (35.42)     | 1 (16.67)    | 0.858 | Ref.          | 0.291 - 25.402 |
|                                                                    | TC               | 50 (52.08)     | 4 (66.66)    |       | 2.720         |                |
|                                                                    | CC               | 12 (12.50)     | 1 (16.67)    |       | 2.833         |                |
|                                                                    | <b>Alleles</b>   |                |              |       |               |                |
| T                                                                  | 118 (61.46)      | 6 (50.00)      | 0.43         | 1.595 | 0.435 - 5.847 |                |
| C                                                                  | 74 (38.54)       | 6 (50.00)      |              |       |               |                |
| <b>TGF-<math>\beta</math>1 codon 25 C/G</b><br><b>(rs 1800471)</b> | <b>Genotypes</b> |                |              |       |               |                |
|                                                                    | GG               | 82 (85.42)     | 5 (83.33)    | 1.000 | Ref.          | 0.136 - 11.677 |
|                                                                    | GC               | 13 (13.54)     | 1 (16.67)    |       | 1.262         |                |
|                                                                    | CC               | 1 (1.04)       | 0            |       | -             |                |

|                                               |                  |             |            |       |       |                |
|-----------------------------------------------|------------------|-------------|------------|-------|-------|----------------|
|                                               | <b>Alleles</b>   |             |            |       |       |                |
|                                               | G                | 177 (92.19) | 11 (91.67) | 1.000 | 1.073 | 0.049 - 9.092  |
|                                               | C                | 15 (7.81)   | 1 (8.33)   |       |       |                |
| <b>IL-10 -1082 G/A</b><br><b>(rs 1800896)</b> | <b>Genotypes</b> |             |            |       |       |                |
|                                               | GG               | 11 (11.46)  | 1 (16.67)  |       | Ref.  |                |
|                                               | GA               | 45 (46.88)  | 2 (33.33)  | 0.87  | 1.212 | 0.115 - 12.831 |
|                                               | AA               | 40 (41.66)  | 3 (50.00)  |       | 0.593 | 0.094 - 3.728  |
|                                               | <b>Alleles</b>   |             |            |       |       |                |
|                                               | G                | 67 (34.90)  | 4 (33.33)  | 1.000 | 1.047 | 0.272 - 4.310  |
|                                               | A                | 125 (65.10) | 8 (66.67)  |       |       |                |
| <b>IL-10 -819 C/T</b><br><b>(rs 1800871)</b>  | <b>Genotypes</b> |             |            |       |       |                |
|                                               | TT               | 12 (12.50)  | 1 (16.67)  |       | Ref.  |                |
|                                               | TC               | 38 (39.58)  | 2 (33.33)  | 1.000 | 0.632 | 0.053 - 7.592  |
|                                               | CC               | 46 (47.92)  | 3 (50.00)  |       | 0.783 | 0.075 - 8.211  |
|                                               | <b>Alleles</b>   |             |            |       |       |                |
|                                               | T                | 62 (32.29)  | 4 (33.33)  | 1.000 | 0.954 | 0.248 - 3.936  |
|                                               | C                | 130 (67.71) | 8 (66.67)  |       |       |                |
| <b>IL-10 -592 C/A</b><br><b>(rs 1800872)</b>  | <b>Genotypes</b> |             |            |       |       |                |
|                                               | CC               | 46 (47.92)  | 3 (50.00)  |       | Ref.  |                |
|                                               | CA               | 37 (38.54)  | 2 (33.33)  | 1.000 | 0.848 | 0.081 - 8.849  |
|                                               | AA               | 13 (13.54)  | 1 (16.67)  |       | 0.703 | 0.059 - 8.410  |

|                                                                |                  |             |           |       |               |                |
|----------------------------------------------------------------|------------------|-------------|-----------|-------|---------------|----------------|
|                                                                | <b>Alleles</b>   |             |           |       |               |                |
|                                                                | C                | 129 (67.19) | 8 (66.67) | 1.000 | 1.024         | 0.248 - 3.942  |
|                                                                | A                | 63 (32.81)  | 4 (33.33) |       |               |                |
| <b>IL-6 -174 C/G</b><br><b>(rs 1800795)</b>                    | <b>Genotypes</b> |             |           |       |               |                |
|                                                                | GG               | 66 (68.75)  | 3 (50.00) |       | Ref.          |                |
|                                                                | GC               | 24 (25.00)  | 2 (33.33) | 0.457 | 1.833         | 0.289 - 11.650 |
|                                                                | CC               | 6 (6.25)    | 1 (16.67) |       | 3.667         | 0.328 - 40.929 |
|                                                                | <b>Alleles</b>   |             |           |       |               |                |
| G                                                              | 156 (81.25)      | 8 (66.67)   | 0.257     | 2.167 | 0.515 - 8.552 |                |
| C                                                              | 36 (18.75)       | 4 (33.33)   |           |       |               |                |
| <b>INF-<math>\gamma</math> +874 T/A</b><br><b>(rs 2430561)</b> | <b>Genotypes</b> |             |           |       |               |                |
|                                                                | TT               | 12 (12.50)  | 1 (16.67) |       | Ref.          |                |
|                                                                | TA               | 44 (45.83)  | 1 (16.67) | 0.336 | 0.833         | 0.085 - 8.182  |
|                                                                | AA               | 40 (41.67)  | 4 (66.66) |       | 0.227         | 0.024 - 2.119  |
|                                                                | <b>Alleles</b>   |             |           |       |               |                |
| T                                                              | 68 (35.42)       | 3 (25.00)   | 0.548     | 1.645 | 0.390 - 7.956 |                |
| A                                                              | 124 (64.58)      | 9 (75.00)   |           |       |               |                |

| Polymorphisms                                     |                  | BMI                                  |                                         |                                      |                                                      |                                                      |                                |
|---------------------------------------------------|------------------|--------------------------------------|-----------------------------------------|--------------------------------------|------------------------------------------------------|------------------------------------------------------|--------------------------------|
|                                                   |                  | < 25 Kg/m <sup>2</sup><br>(n=19) (%) | 25 - 30 Kg/m <sup>2</sup><br>(n=25) (%) | ≥ 30 Kg/m <sup>2</sup><br>(n=58) (%) | p                                                    | OR <sup>#</sup>                                      | CI (95%)                       |
| <b>TNF-α -308 A/G</b><br><b>(rs 1800629)</b>      | <b>Genotypes</b> |                                      |                                         |                                      |                                                      |                                                      |                                |
|                                                   | GG               | 14 (73.68)                           | 22 (88.00)                              | 42 (72.41)                           | 0.625                                                | Ref. (BMI < 25 Kg/m <sup>2</sup> )<br>0.838<br>-     | 0.638 - 1.100<br>-             |
|                                                   | GA               | 5 (26.32)                            | 3 (12.00)                               | 15 (25.86)                           |                                                      |                                                      |                                |
|                                                   | AA               | 0                                    | 0                                       | 1 (1.73)                             |                                                      |                                                      |                                |
|                                                   | <b>Alleles</b>   |                                      |                                         |                                      | p <sup>a</sup> ,p <sup>b</sup> ,p <sup>c</sup> >0.05 | 0.421<br>1.133                                       | 0.073 - 2.227<br>0.355 - 3.831 |
| G                                                 | 33 (86.84)       | 47 (94.00)                           | 99 (85.34)                              |                                      |                                                      |                                                      |                                |
| A                                                 | 5 (13.16)        | 3 (6.00)                             | 17 (14.66)                              |                                      |                                                      |                                                      |                                |
| <b>TGF-β1 codon 10 T/C</b><br><b>(rs 1982073)</b> | <b>Genotypes</b> |                                      |                                         |                                      |                                                      |                                                      |                                |
|                                                   | TT               | 5 (26.32)                            | 12 (48.00)                              | 18 (31.04)                           | 0.026*                                               | Ref. (BMI < 25 Kg/m <sup>2</sup> )<br>1.963<br>1.546 | 1.007 - 3.826<br>1.858 - 2.786 |
|                                                   | TC               | 8 (42.10)                            | 10 (40.00)                              | 36 (62.07) <sup>a</sup>              |                                                      |                                                      |                                |
|                                                   | CC               | 6 (31.58) <sup>a</sup>               | 3 (12.00)                               | 4 (6.89)                             |                                                      |                                                      |                                |
|                                                   | <b>Alleles</b>   |                                      |                                         |                                      | p <sup>a</sup> ,p <sup>b</sup> ,p <sup>c</sup> >0.05 | 0.424<br>0.550                                       | 0.161 - 1.104<br>0.246 - 1.226 |
| T                                                 | 18 (47.37)       | 34 (68.00)                           | 72 (62.07)                              |                                      |                                                      |                                                      |                                |
| C                                                 | 20 (52.63)       | 16 (32.00)                           | 44 (37.93)                              |                                      |                                                      |                                                      |                                |
| <b>TGF-β1 codon 25 C/G</b><br><b>(rs 1800471)</b> | <b>Genotypes</b> |                                      |                                         |                                      |                                                      |                                                      |                                |
|                                                   | GG               | 16 (84.21)                           | 21 (84.00)                              | 50 (86.21)                           | 0.613                                                | Ref. (BMI < 25 Kg/m <sup>2</sup> )<br>0.562<br>0.579 | 0.169 - 1.870<br>0.189 - 1.778 |
|                                                   | GC               | 3 (15.79)                            | 3 (12.00)                               | 8 (13.79)                            |                                                      |                                                      |                                |
|                                                   | CC               | 0                                    | 1 (4.00)                                | 0                                    |                                                      |                                                      |                                |



|                                               |                  |            |            |                        |                        |                                    |               |
|-----------------------------------------------|------------------|------------|------------|------------------------|------------------------|------------------------------------|---------------|
|                                               | <b>Alleles</b>   |            |            |                        |                        |                                    |               |
|                                               | G                | 35 (92.11) | 45 (90.00) | 108 (93.10)            | $p^a, p^b, p^c > 0.05$ | 1.296                              | 0.245 - 7.439 |
|                                               | C                | 3 (7.89)   | 5 (10.00)  | 8 (6.90)               |                        | 0.864                              | 0.193 - 4.375 |
| <b>IL-10 -1082 G/A</b><br><b>(rs 1800896)</b> | <b>Genotypes</b> |            |            |                        |                        |                                    |               |
|                                               | GG               | 2 (10.53)  | 2 (8.00)   | 8 (13.79)              | 0.677                  | Ref. (BMI < 25 Kg/m <sup>2</sup> ) |               |
|                                               | GA               | 11 (57.89) | 10 (40.00) | 26 (44.83)             |                        | 0.902                              | 0.697 - 1.168 |
|                                               | AA               | 6 (31.58)  | 13 (52.00) | 24 (41.38)             |                        | 0.712                              | 0.558 - 0.908 |
|                                               | <b>Alleles</b>   |            |            |                        |                        |                                    |               |
| G                                             | 15 (39.47)       | 14 (28.00) | 42 (36.21) | $p^a, p^b, p^c > 0.05$ | 1.677                  | 0.623 - 4.533                      |               |
| A                                             | 23 (60.53)       | 36 (72.00) | 74 (63.79) |                        | 1.149                  | 0.506 - 2.600                      |               |
| <b>IL-10 -819 C/T</b><br><b>(rs 1800871)</b>  | <b>Genotypes</b> |            |            |                        |                        |                                    |               |
|                                               | TT               | 4 (21.05)  | 5 (20.00)  | 4 (6.90)               | 0.133                  | Ref. (BMI < 25 Kg/m <sup>2</sup> ) |               |
|                                               | TC               | 9 (47.37)  | 6 (24.00)  | 25 (43.10)             |                        | 0.870                              | 0.672 - 1.125 |
|                                               | CC               | 6 (31.58)  | 14 (56.00) | 29 (50.00)             |                        | 0.622                              | 0.484 - 0.799 |
|                                               | <b>Alleles</b>   |            |            |                        |                        |                                    |               |
| T                                             | 17 (44.74)       | 16 (32.00) | 33 (28.45) | $p^a, p^b, p^c > 0.05$ | 1.720                  | 0.657 - 4.524                      |               |
| C                                             | 21 (55.26)       | 34 (68.00) | 83 (71.55) |                        | 2.036                  | 0.894 - 4.639                      |               |
| <b>IL-10 -592 C/A</b><br><b>(rs 1800872)</b>  | <b>Genotypes</b> |            |            |                        |                        |                                    |               |
|                                               | CC               | 6 (31.58)  | 14 (56.00) | 29 (50.00)             | 0.058                  | Ref. (BMI < 25 Kg/m <sup>2</sup> ) |               |
|                                               | CA               | 9 (47.37)  | 5 (20.00)  | 25 (43.10)             |                        | 0.876                              | 0.677 - 1.134 |
|                                               | AA               | 4 (21.05)  | 6 (24.00)  | 4 (6.90)               |                        | 0.621                              | 0.483 - 0.798 |

|                                                                |                  |            |            |                                      |                        |                                    |               |
|----------------------------------------------------------------|------------------|------------|------------|--------------------------------------|------------------------|------------------------------------|---------------|
|                                                                | <b>Alleles</b>   |            |            |                                      |                        |                                    |               |
|                                                                | C                | 21 (55.26) | 33 (66.00) | 83 (71.55)                           | $p^a, p^b, p^c > 0.05$ | 0.636                              | 0.244 - 1.654 |
|                                                                | A                | 17 (44.74) | 17 (34.00) | 33 (28.45)                           |                        | 0.461                              | 0.216 - 1.118 |
| <b>IL-6 -174 C/G</b><br><b>(rs 1800795)</b>                    | <b>Genotypes</b> |            |            |                                      |                        |                                    |               |
|                                                                | GG               | 13 (68.42) | 15 (60.00) | 41 (70.69)                           | 0.806                  | Ref. (BMI < 25 Kg/m <sup>2</sup> ) |               |
|                                                                | GC               | 5 (26.32)  | 7 (28.00)  | 14 (24.14)                           |                        | 0.784                              | 0.594 - 1.034 |
|                                                                | CC               | 1 (5.26)   | 3 (12.00)  | 3 (5.17)                             |                        | 0.661                              | 0.510 - 0.856 |
|                                                                | <b>Alleles</b>   |            |            |                                      |                        |                                    |               |
| G                                                              | 31 (81.58)       | 37 (74.00) | 96 (82.76) | $p^a, p^b, p^c > 0.05$               | 1.556                  | 0.467 - 4.977                      |               |
| C                                                              | 7 (18.42)        | 13 (26.00) | 20 (17.24) |                                      | 0.923                  | 0.328 - 2.669                      |               |
| <b>INF-<math>\gamma</math> +874 T/A</b><br><b>(rs 2430561)</b> | <b>Genotypes</b> |            |            |                                      |                        |                                    |               |
|                                                                | TT               | 3 (15.78)  | 4 (16.00)  | 6 (10.34)                            | 0.228                  | Ref. (BMI < 25 Kg/m <sup>2</sup> ) |               |
|                                                                | TA               | 8 (42.11)  | 15 (60.00) | 22 (37.93)                           |                        | 0.737                              | 0.393 - 1.384 |
|                                                                | AA               | 8 (42.11)  | 6 (24.00)  | 30 (51.73)                           |                        | 1.251                              | 0.701 - 2.232 |
|                                                                | <b>Alleles</b>   |            |            |                                      |                        |                                    |               |
| T                                                              | 14 (36.84)       | 23 (46.00) | 34 (29.31) | $p^c = 0.038^*$<br>$p^a, p^b > 0.05$ | 0.685                  | 1.264 - 1.769                      |               |
| A                                                              | 24 (63.16)       | 27 (54.00) | 82 (70.69) |                                      | 1.407                  | 0.606 - 3.250                      |               |

BMI - Body Mass Index

\* $p < 0.05$  was considered statistically significant

#BMI < 25 Kg/m<sup>2</sup> was reference in the Odds Ratio estimation for genotype and allele frequencies - BMI < 25 Kg/m<sup>2</sup> versus BMI 25 - 30 Kg/m<sup>2</sup> and BMI < 25 Kg/m<sup>2</sup> versus BMI  $\geq$  30 Kg/m<sup>2</sup>, respectively

$p^a$ : group (BMI < 25 Kg/m<sup>2</sup>) versus group (BMI 25 - 30 Kg/m<sup>2</sup>)

$p^b$ : group (BMI < 25 Kg/m<sup>2</sup>) versus group (BMI  $\geq$  30 Kg/m<sup>2</sup>)

$p^c$ : group (BMI 25 - 30 Kg/m<sup>2</sup>) versus group (BMI  $\geq$  30 Kg/m<sup>2</sup>)  
a (more frequent) – residual analysis
